# Supplementary material for: Robustness and uncertainties in the new CMIP5 climate model projections
Source: Springer Nature journal article supplement (doi:10.1038/nclimate1716), 2012-10-25
Supplement: 41558_2013_BFnclimate1716_MOESM429_ESM.pdf [file 41558_2013_BFnclimate1716_MOESM429_ESM.pdf]

## Robustness and uncertainties in the new CMIP5 climate model projections

Reto Knutti\* and Jan Sedláček, Institute for Atmospheric and Climate Science, ETH Zurich, Switzerland

### Supplementary figures

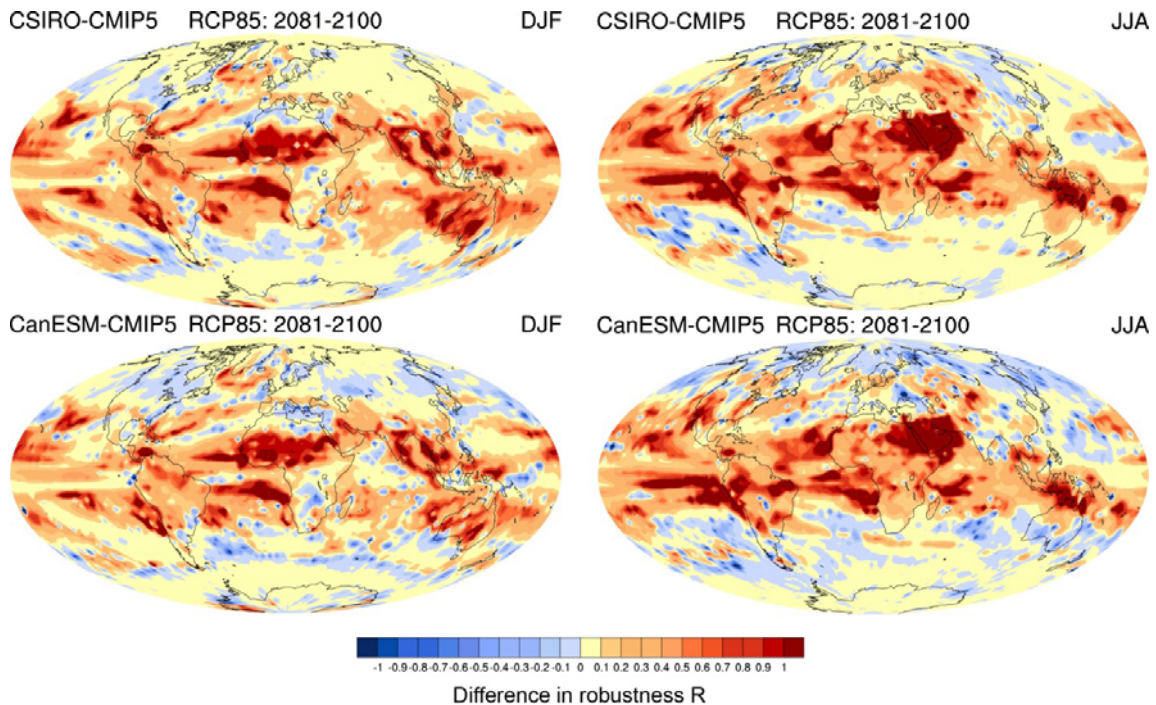

Supplementary figure S1: Difference in robustness  $R$  between the CSIRO initial condition ensemble and CMIP5 (top), and between the CanESM2 ensemble and CMIP5 (bottom), for December to February (DJF) and June to August (JJA) precipitation. Red colors in the Tropics indicate where the initial condition ensemble has a higher robustness than the multi model ensemble.

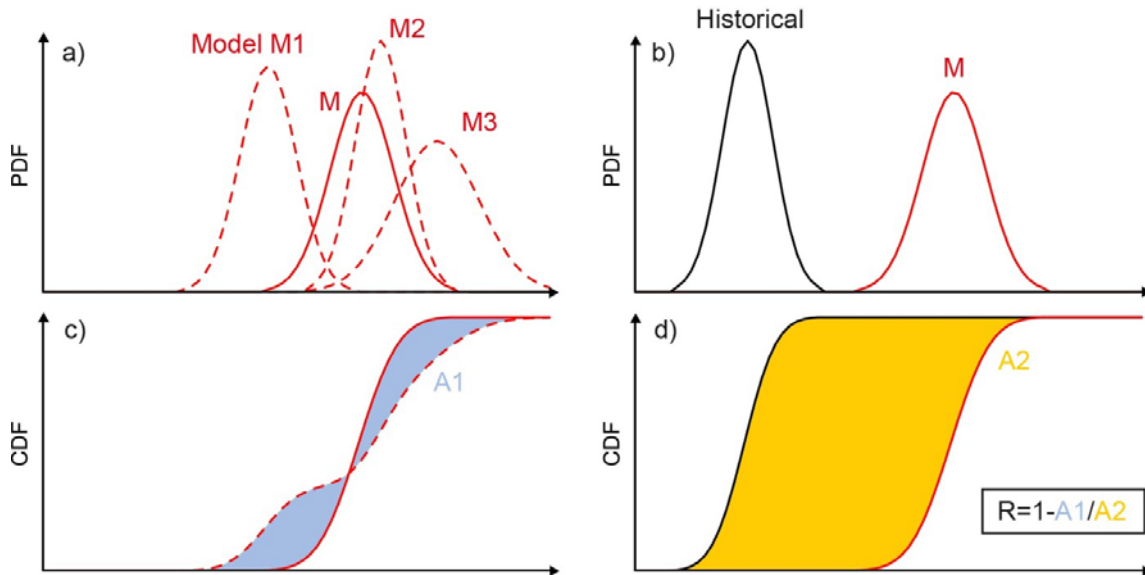

Supplementary figure S2: The robustness  $R$  illustrated in an example. a) Probability density function (PDF) of projected changes from three illustrative models (red dashed) and the multi model mean (red solid), b) PDF of historical (black solid) and future multi model mean (red solid), c) the cumulative density functions (CDF) from panel a, d) CDFs from panel b. PDFs are calculated from a seasonal average in each year of the 20yr period. PDFs are assumed to be Gaussian. The robustness is defined as  $R=1-A1/A2$ , where  $A1$  is defined as the integral of the squared area (blue) between two cumulative density functions (CDF) characterizing the individual model projections (panel c, red dashed) and the multi model mean projection (panel c, red solid), and  $A2$  the integral of the squared area (orange) between two CDFs characterizing the multi model projection (panel d, red solid) and the historical climate (panel d, black solid).  $R=1$  implies perfect agreement,  $R$  close to zero a case where the model spread is comparable to the signal, and negative  $R$  a case where the spread is much larger than the signal.

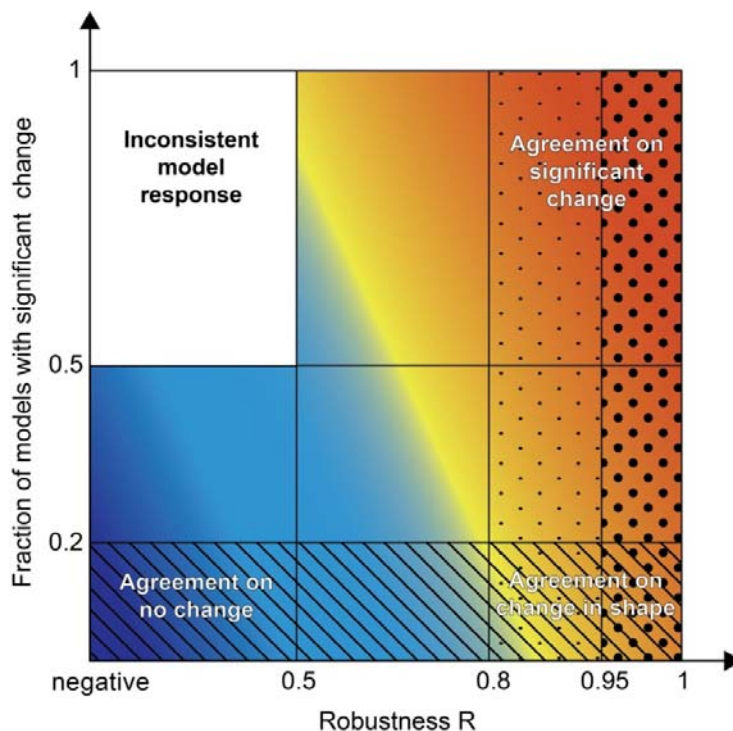

Supplementary figure S3: Schematic illustration of criteria used for maps. For the temperature and precipitation maps in Fig. 2/3, colored contours show the multi model mean values. Significance of change and model agreement can be interpreted as two orthogonal criteria. High agreement ( $R>0.8$ ) is marked by small dots stippling, very high agreement ( $R>0.95$ ) by large dots stippling (see Methods and Fig. S1 for the definition of  $R$ ). Hatching marks areas where less than 20% of the models show a significant change. White marks areas with inconsistent model response, defined as at least half of the models indicating significant change but low robustness ( $R<0.5$ ). Colors without stippling and hatching can be interpreted as regions with limited evidence for change in the indicated direction. Note that the choice of particular thresholds is subjective and depends on the application.

Supplementary Table 1: Models used in the analysis. Note that one or two models are missing in some figure panels due to incomplete availability of data. Models used in the subset analysis are marked by an asterisk.

### CMIP5 models

ACCESS1-0  
 ACCESS1-3  
 CCSM4  
 CESM1-BGC  
 CESM1-CAM5\*  
 CMCC-CM  
 CNRM-CM5\*  
 CSIRO-Mk3-6-0\*  
 CanESM2\*  
 FGOALS-g2  
 FGOALS-s2  
 FIO-ESM  
 GFDL-CM3\*  
 GFDL-ESM2G  
 GFDL-ESM2M  
 GISS-E2-R\*  
 HadGEM2-AO  
 HadGEM2-CC  
 HadGEM2-ES\*  
 IPSL-CM5A-LR  
 IPSL-CM5A-MR\*  
 MIROC-ESM-CHEM  
 MIROC-ESM  
 MIROC5\*  
 MPI-ESM-LR  
 MPI-ESM-MR\*  
 MRI-CGCM3\*  
 NorESM1-M  
 bcc-csm1-1  
 inmcm4

### CMIP3

bccr\_bcm2\_0  
 cccma\_cgcm3\_1\*  
 cnrm\_cm3\*  
 csiro\_mk3\_0\*  
 csiro\_mk3\_5  
 gfdl\_cm2\_0  
 gfdl\_cm2\_1\*  
 giss\_model\_e\_r\*  
 ingv\_echam4  
 inmcm3\_0  
 ipsl\_cm4\*  
 miroc3\_2\_medres\*  
 miub\_echo\_g  
 mpi\_echam5\*  
 mri\_cgcm2\_3\_2a\*  
 ncar\_ccsm3\_0\*  
 ncar\_pcm1  
 ukmo\_hadcm3  
 ukmo\_hadgem1\*
